# Supplementary material
Source: publisher site journal article supplement (https://www.dovepress.com/article/567679)
Supplement: Supplementary file 1 [file Supplementary%20Material.pdf]

## Supplementary Material

**Supplementary Table 1** Demographic data, Clinical settings, Laboratory features, and Previous treatment of severe COVID-19 pneumonia patients at tocilizumab administration day

| <b>Parameters</b><br>n (%), mean $\pm$ SD, or median (IQR) | <b>All patients</b><br>(n = 109) | <b>Intubated</b><br>(n = 32) | <b>Non-intubated</b><br>(n = 77) | <b>P value</b> |
|------------------------------------------------------------|----------------------------------|------------------------------|----------------------------------|----------------|
| <b>Demographic Data</b>                                    |                                  |                              |                                  |                |
| Age (years)                                                | 60.3 $\pm$ 14.2                  | 64.7 $\pm$ 14.4              | 58.4 $\pm$ 13.7                  | <b>0.034</b>   |
| Age $\geq$ 70 years (%)                                    | 29 (26.6)                        | 13 (40.6)                    | 16 (20.8)                        | <b>0.033</b>   |
| Male (%)                                                   | 56 (51.4)                        | 16 (50.0)                    | 40 (51.9)                        | 0.853          |
| BMI (kg/m <sup>2</sup> )                                   | 26.8 (24.0, 31.2)                | 27.2 (23.5, 31.7)            | 26.8 (24.1, 31.2)                | 0.806          |
| Comorbidity (%)                                            | 67 (61.5)                        | 20 (62.5)                    | 47 (61.0)                        | 0.886          |
| Chronic lung disease                                       | 5 (4.6)                          | 3 (9.4)                      | 2 (2.6)                          | 0.150          |
| Diabetes mellitus                                          | 36 (33.0)                        | 11 (34.4)                    | 25 (32.5)                        | 0.847          |
| Hypertension                                               | 51 (46.8)                        | 16 (50.0)                    | 35 (45.5)                        | 0.665          |
| Chronic kidney disease                                     | 14 (12.8)                        | 5 (15.6)                     | 9 (11.7)                         | 0.547          |
| Coronary artery disease                                    | 7 (6.4)                          | 3 (9.4)                      | 4 (5.2)                          | 0.416          |
| Cerebrovascular disease                                    | 7 (6.4)                          | 3 (9.4)                      | 4 (5.2)                          | 0.416          |
| Cancer                                                     | 7 (6.4)                          | 2 (6.3)                      | 5 (6.5)                          | 1.000          |
| Autoimmune disease                                         | 4 (3.7)                          | 1 (3.1)                      | 3 (3.9)                          | 1.000          |
| COVID-19 vaccination (n =103) (%)                          | 21 (20.4)                        | 4 (13.3)                     | 17 (23.3)                        | 0.255          |

| <b>Parameters</b><br>n (%), mean ± SD, or median (IQR) | <b>All patients</b><br>(n = 109) | <b>Intubated</b><br>(n = 32) | <b>Non-intubated</b><br>(n = 77) | <b>P value</b> |
|--------------------------------------------------------|----------------------------------|------------------------------|----------------------------------|----------------|
| <b>Clinical settings</b>                               |                                  |                              |                                  |                |
| COVID-19 illness duration (days)                       | 9.0 (7.0, 11.0)                  | 7.5 (6.0, 9.0)               | 9.0 (7.0, 11.0)                  | <b>0.003</b>   |
| Non-invasive ventilation (%)                           | 18 (16.5)                        | 8 (25.0)                     | 10 (13.0)                        | 0.124          |
| SpO <sub>2</sub> /FiO <sub>2</sub> ratio               | 163.3 (118.8, 240.0)             | 132.0 (98.2, 166.7)          | 165.0 (123.7, 242.5)             | <b>0.009</b>   |
| Respiratory rate/min                                   | 23.0 (20.0, 27.0)                | 24.0 (20.0, 28.0)            | 23.0 (20.0, 25.5)                | 0.087          |
| <b>Laboratory features</b>                             |                                  |                              |                                  |                |
| WBC (x 10 <sup>6</sup> /mm <sup>3</sup> )              | 10.5 ± 4.4                       | 10.0 ± 5.0                   | 10.7 ± 4.1                       | 0.438          |
| Platelet (x 10 <sup>6</sup> /mm <sup>3</sup> )         | 248.4 ± 85.7                     | 226.7 ± 76.6                 | 257.5 ± 88.1                     | 0.087          |
| IL-6 (n = 90) (pg/ml)                                  | 43.6 (18.2, 75.2)                | 51.7 (20.5, 82.2)            | 32.4 (15.4, 73.0)                | 0.240          |
| C-reactive protein (mg/L)                              | 76.4 (45.4, 133.0)               | 79.0 (37.6, 108.5)           | 73.3 (46.7, 134.2)               | 0.323          |
| Lactate dehydrogenase (U/L)                            | 402.0 (307.5, 527.5)             | 395.0 (304.0, 549.3)         | 404.0 (308.5, 472.5)             | 0.558          |
| eGFR (ml/min/1.73m <sup>2</sup> )                      | 94.5 (74.8, 102.7)               | 87.5 (57.8, 101.0)           | 96.0 (79.1, 106.2)               | 0.058          |
| Sodium (mmol/L)                                        | 135.8 ± 3.4                      | 136.9 ± 3.4                  | 135.4 ± 3.4                      | <b>0.036</b>   |
| Potassium (mmol/L)                                     | 4.2 ± 0.5                        | 4.1 ± 0.6                    | 4.3 ± 0.5                        | <b>0.046</b>   |
| Chloride (mmol/L)                                      | 100.6 ± 4.6                      | 101.9 ± 4.4                  | 100.1 ± 4.6                      | 0.054          |
| Bicarbonate (mmol/L)                                   | 23.1 ± 3.3                       | 22.6 ± 3.5                   | 23.3 ± 3.2                       | 0.294          |
| <b>Previous treatment</b>                              |                                  |                              |                                  |                |
| IV methylprednisolone (mg)                             | 500.0 (250.0, 1000.0)            | 500 (312.5, 1000.0)          | 500.0 (250.0, 875.0)             | 0.207          |

| <b>Parameters</b><br>n (%), mean ± SD, or median (IQR) | <b>All patients</b><br>(n = 109) | <b>Intubated</b><br>(n = 32) | <b>Non-intubated</b><br>(n = 77) | <b>P value</b> |
|--------------------------------------------------------|----------------------------------|------------------------------|----------------------------------|----------------|
| Remdesivir (%)                                         | 36 (33.0)                        | 10 (31.3)                    | 26 (33.8)                        | 0.799          |
| Prophylactic anticoagulant (%)                         | 98 (89.9)                        | 29 (90.6)                    | 69 (89.6)                        | 1.000          |
| Baricitinib (%)                                        | 8 (7.3%)                         | 2 (6.3%)                     | 6 (7.8%)                         | 1.000          |
| Tofacitinib (%)                                        | 7 (6.4)                          | 2 (6.3)                      | 5 (6.5)                          | 1.000          |

**Note:** P < 0.05: significant (shown in bold).

**Abbreviations:** BMI, body mass index; eGFR, estimated glomerular filtration rate; IL, interleukin; IQR, interquartile range; IV, intravenous; SD, standard deviation; SpO<sub>2</sub>/ FiO<sub>2</sub> ratio, pulse oximetric saturation to fraction inspired oxygen ratio; WBC, white blood cell count.

**Supplementary Table 2** Sensitivity, Specificity, Positive predictive value, and Positive likelihood ratio for each cut-off point of the scoring system

| Score cut-off point | Patients with progressive respiratory failure (%) | Patients without progressive respiratory failure (%) | Sensitivity | 95% CI    | Specificity | 95% CI     | Positive predictive value | 95% CI     | Positive likelihood ratio | 95% CI  |
|---------------------|---------------------------------------------------|------------------------------------------------------|-------------|-----------|-------------|------------|---------------------------|------------|---------------------------|---------|
| ≥ 0                 | 32 (29.4)                                         | 77 (70.6)                                            | 100.0       | -         | 0.0         | -          | -                         | -          | 1.0                       | -       |
| ≥ 1                 | 30 (37.5)                                         | 50 (62.5)                                            | 93.8        | 79.2-99.2 | 35.1        | 24.5-46.8  | 37.5                      | 26.9-49.0  | 1.4                       | 1.2-1.7 |
| ≥ 2                 | 11 (61.1)                                         | 7 (38.9)                                             | 34.4        | 18.6-53.2 | 90.9        | 82.2-96.3  | 61.1                      | 35.7-82.7  | 3.8                       | 1.6-8.9 |
| ≥ 3                 | 2 (100.0)                                         | 0 (0.0)                                              | 6.3         | 0.9-20.8  | 100.0       | 95.3-100.0 | 100.0                     | 15.8-100.0 | -                         | -       |

**Abbreviations:** CI, confidence interval.
